# Supplementary material
Source: publisher site journal article supplement (https://www.kjim.org/upload/media/kjim-2022-069-suppl3.pdf)
Supplement: Supplementary file 1 [file kjim-2022-069-suppl3.pdf]

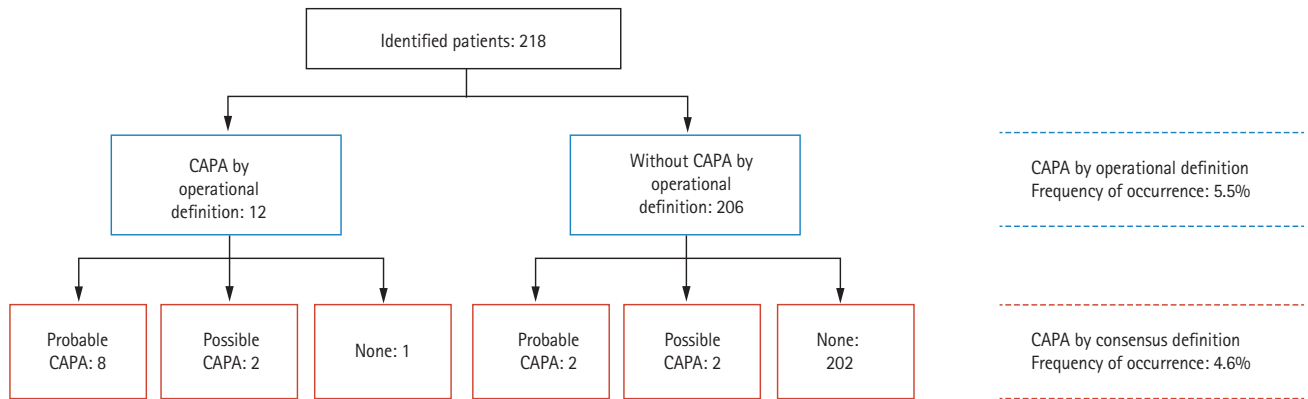

**Supplementary Figure 1.** Agreement analysis of coronavirus disease 2019 (COVID-19)-associated pulmonary aspergillosis (CAPA) by operational definition and consensus definition by European Confederation of Medical Mycology and the International Society for Human and Animal Mycology.
